# Supplementary material for: Oncological outcome and patient satisfaction with skin-sparing mastectomy and immediate breast reconstruction: a prospective observational study
Source: Springer Nature journal article supplement (doi:10.1186/1471-2407-10-171), 2010-04-29

(a)

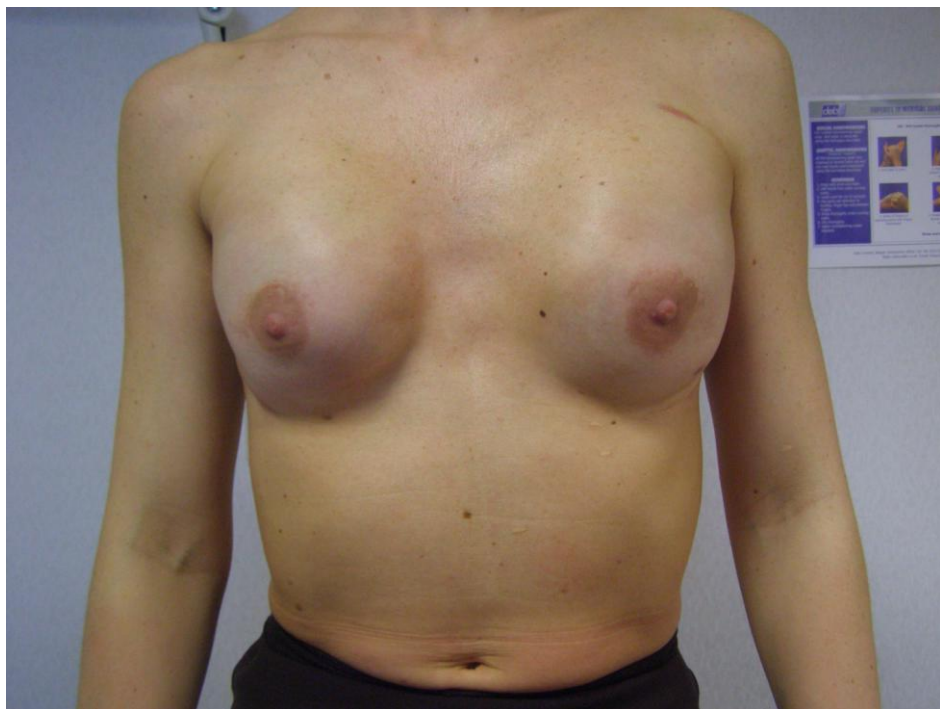

(b)

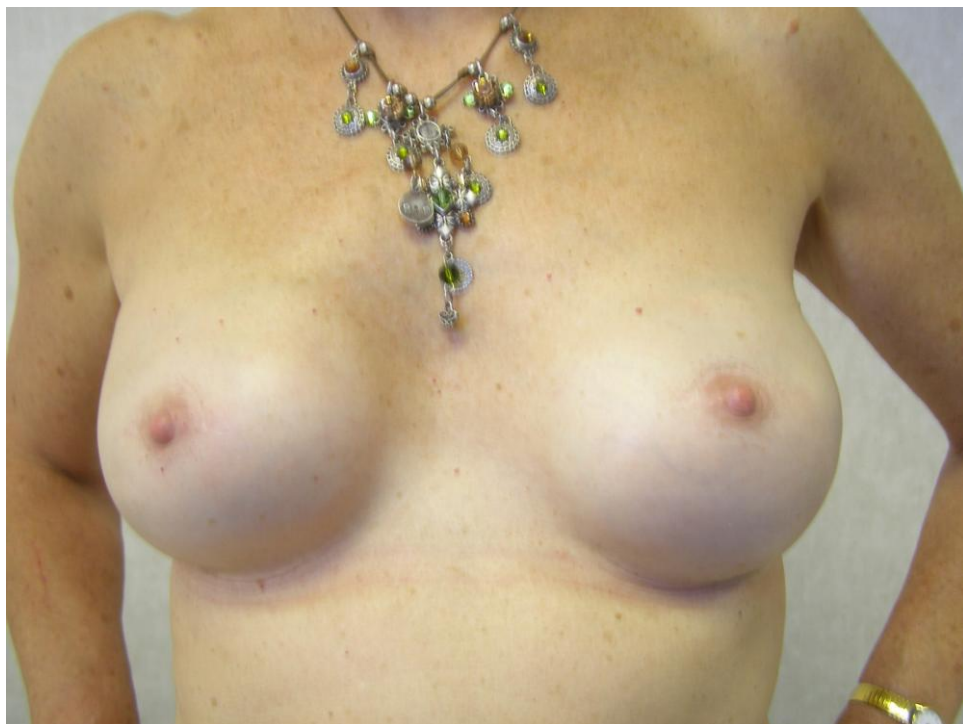

Supplement: 12885_2009_1970_MOESM4_ESM.pdf [file 12885_2009_1970_MOESM4_ESM.pdf]
